# Supplementary material for: Towards superior oxygen evolution through graphene barriers between metal substrates and hydroxide catalysts
Source: Royal Society of Chemistry journal article supplement (doi:10.1039/c5ta03422a), 2015-01-01
Supplement: c5ta03422a1.pdf [file c5ta03422a1.pdf]

Electronic Supplementary Information for

**Towards superior oxygen evolution through graphene barriers  
between metal substrates and hydroxide catalysts**

*Hao-Fan Wang<sup>1</sup>, Cheng Tang<sup>1</sup>, and Qiang Zhang\**

Beijing Key Laboratory of Green Chemical Reaction Engineering and Technology,  
Department of Chemical Engineering, Tsinghua University, Beijing 100084, PR China

\* Corresponding author.

E-mail address: zhang-qiang@mails.tsinghua.edu.cn (Q. Zhang)

<sup>1</sup> H.F. Wang and C. Tang contribute equally

## I. Supplementary figures

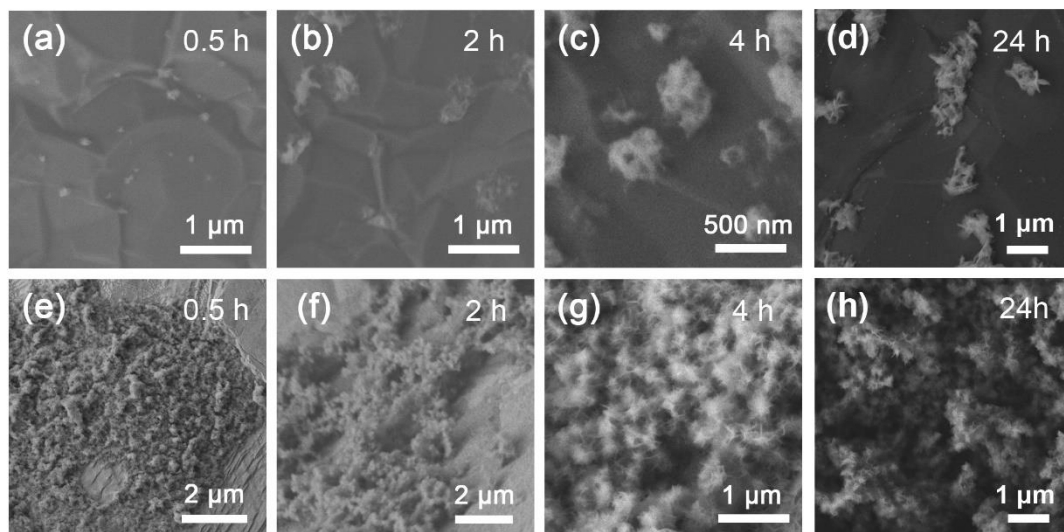

**Fig. S1.** (a-d) SEM images of LDH/G/Ni with the LDH growth duration of 0.5, 2.0, 4.0, and 24.0 h. (e-h) SEM images of LDH/Ni with the LDH growth duration of 0.5, 2.0, 4.0, and 24.0 h.

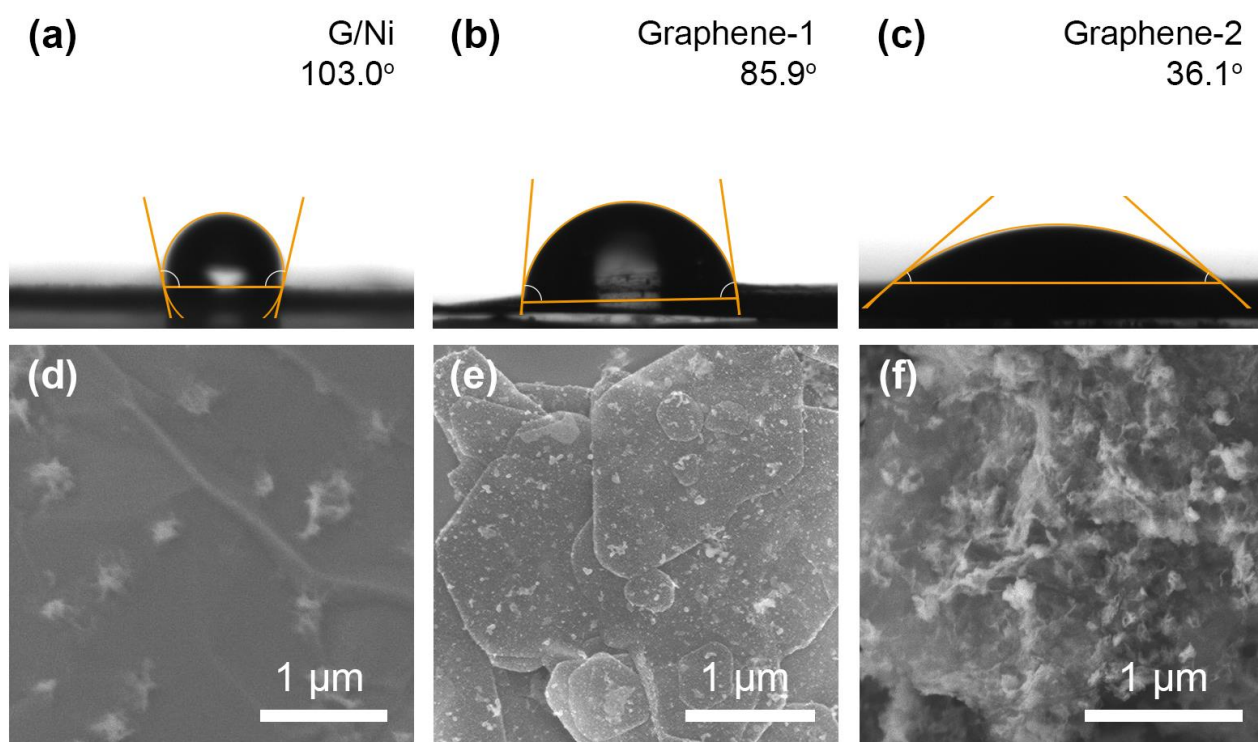

**Fig. S2.** (a-c) The contact angles of LDH/graphene composites with LDHs grown on G/Ni, Graphene-1, and Graphene-2. (d-f) The morphology of LDHs grown on G/Ni, Graphene-1, and Graphene-2. Graphene-1 was synthesized by a MgO-templated CVD method at 950 °C for 10 min using methane as carbon source. After purification, the graphene with a contact angle of 85.9 ° was obtained by further mixing with concentrated sulfuric acid at 10 °C for 10 h. Graphene-2 (thermal reduced graphene oxide (GO)) with a contact angle of 36.1 ° was prepared with graphite as raw material. Graphite was oxidized to GO by a modified Hummer's method, then the GO was kept at 250 °C for 20 min in high vacuum (below 5 Pa) to obtain Graphene-2. The LDHs get dense and continuous with decrease of the contact angle, indicating that the hydrophobicity of graphene increases the LDH nucleation resistance and facilitates the loose distribution of LDHs.

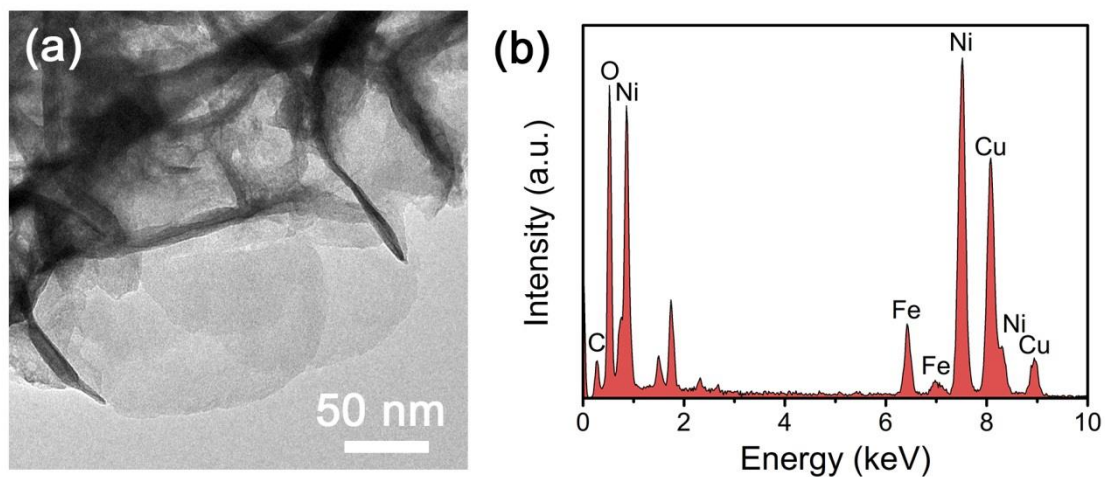

**Fig. S3.** (a) TEM image of p-NiFe LDH. (b) EDS pattern of p-NiFe LDH in the region presented in Fig. S3a. The nano-structure of p-NiFe LDHs resembles the LDH sheets on LDH/G/Ni. The Ni:Fe mole ratio of p-NiFe LDH is 5.9:1, also approximate to that of LDHs in LDH/G/Ni.

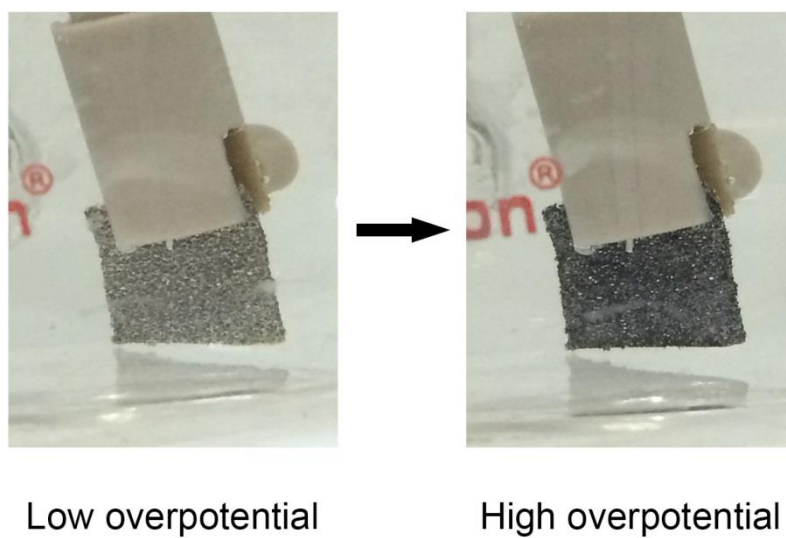

**Fig. S4.** The morphology evolution of G/Ni during the OER process, indicating the oxidation of Ni at a high overpotential of 0.5 V.

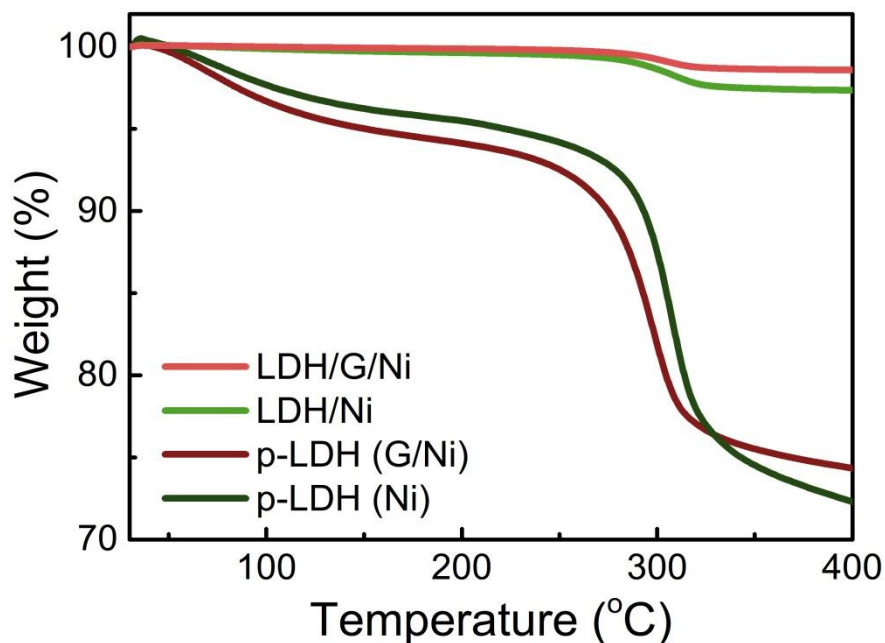

**Fig. S5.** TGA plots of LDH/G/Ni, LDH/Ni, and the respective precipitate LDHs. The p-LDH (G/Ni) stands for the LDH precipitate generated in the synthesis process of LDH/G/Ni, and p-LDH (Ni) was named in the same way. The LDHs grown on substrate and the LDH precipitate are regarded as the same in composition. Assuming that the mass of LDH/G/Ni was  $m$ , and the weight loss were  $a\%$  and  $b\%$  for LDH/G/Ni and p-LDH (G/Ni), then the loading amount of LDH on LDH/G/Ni was  $m \cdot a/b$ . The computing method is the same for LDH/Ni. The loading amount of LDHs on LDH/G/Ni and LDH/Ni is  $2.18$  and  $3.63 \text{ mg cm}^{-2}$ , respectively.

LDH/Ni  
20.3°

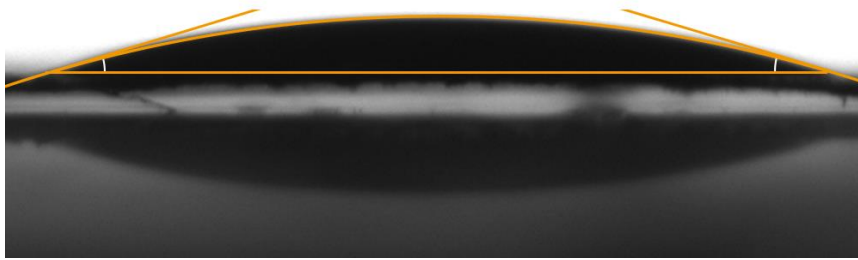

**Fig. S6.** The contact angle of LDH/Ni sample.

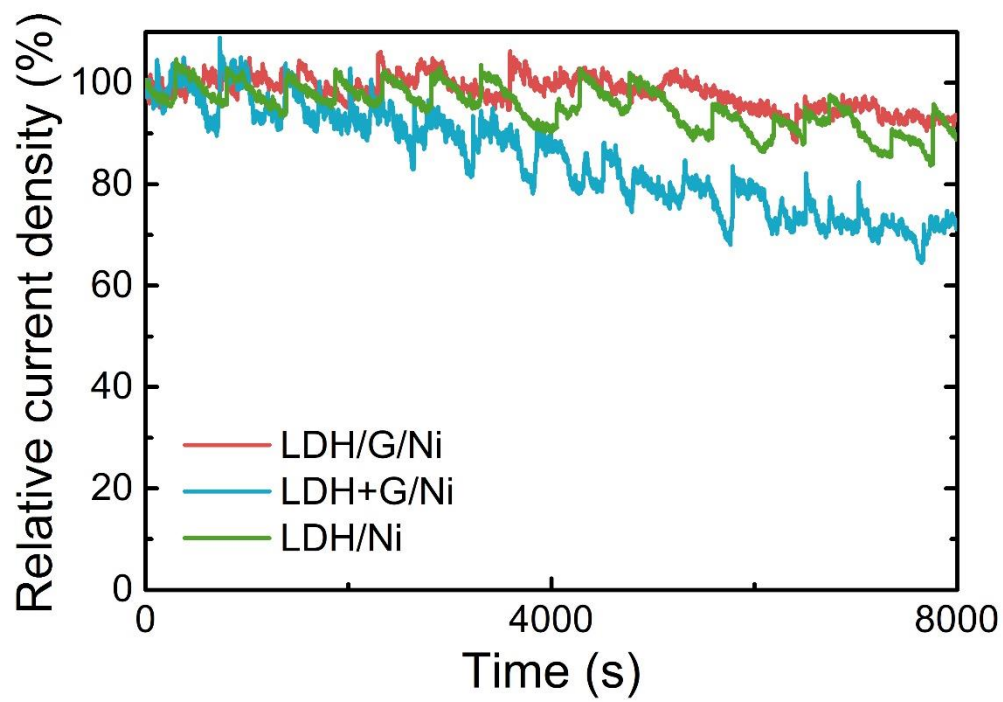

**Fig. S7.** Chronoamperometric response of LDG/G/Ni, LDH+G/Ni and LDH/Ni at initial current density of 10.0 mA cm<sup>-2</sup> in 0.10 M KOH.



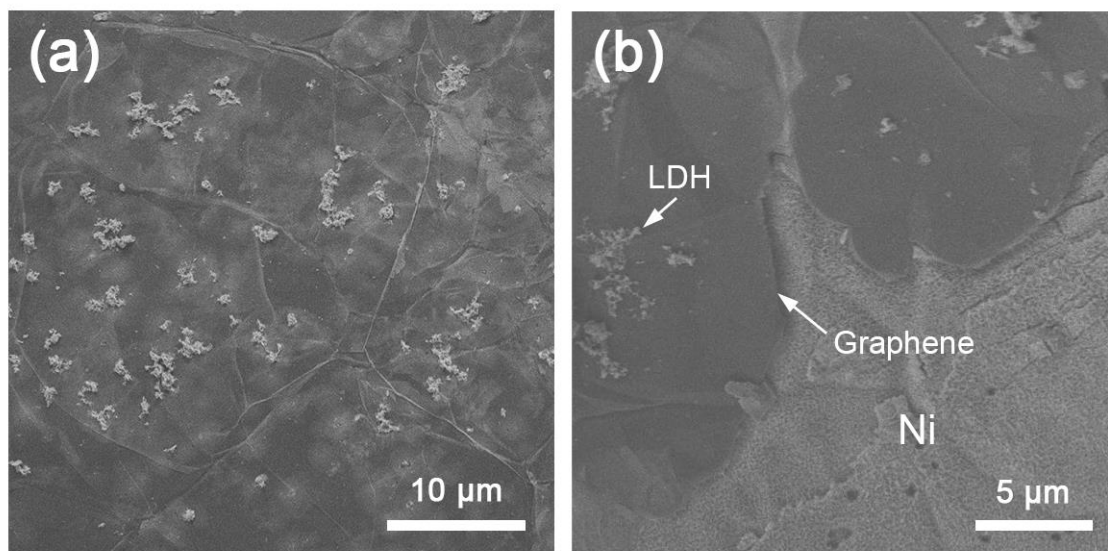

**Fig. S8.** The SEM images of LDH/G/Ni after long period of OER catalysis. (a) The morphology remains the same as the initial LDH/G/Ni in most regions. (b) Graphene layer peeled off and bare Ni was exposed at few edge areas.

## II. Supplementary table

**Table S1.** A summary of the OER performances of on transition metal compounds based catalysts<sup>a)</sup>

| Samples                             | $\eta_{\text{onset}}$<br>(mV) | $\eta_{10}$<br>(mV) | $j_{350}$<br>(mA cm <sup>-2</sup> ) | Tafel slope<br>(mV dec <sup>-1</sup> ) | Ref.         |
|-------------------------------------|-------------------------------|---------------------|-------------------------------------|----------------------------------------|--------------|
| LDH/G/Ni                            | 240                           | 325                 | 34.8                                | 44                                     | This<br>work |
| LDH/Ni                              | 250                           | 350                 | 10.3                                | 51                                     |              |
| G/Ni                                | 300                           | 399                 | 2.6                                 | 52                                     |              |
| Ni-Fe LDH/SWCNT                     | 270                           | 316                 | -                                   | 35                                     | [1]          |
| NG/NiCo <sub>2</sub> O <sub>4</sub> | 323                           | 457                 | 3.5                                 | 156                                    | [2]          |
| 3D NF/PC/AN                         | 297                           | 510                 | -                                   | -                                      | [3]          |
| MWCNT/Ni(OH) <sub>2</sub>           | 350                           | 474                 | 0                                   | 87                                     | [4]          |
| 3D NiFe LDH                         | 230                           | 250                 | -                                   | 50                                     | [5]          |
| CQD/NiFe LDH                        | 260                           | 305                 | -                                   | 35                                     | [6]          |
| G-Co <sub>3</sub> O <sub>4</sub>    | 206                           | 359                 | 9                                   | 67                                     | [7]          |
| Co <sub>3</sub> O <sub>4</sub> C-NA | 240                           | 290                 | 28                                  | 70                                     | [8]          |
| Ni@NiCoOH                           | 310                           | 460                 | 0.5                                 | 65                                     | [9]          |
| $\alpha$ -Ni(OH) <sub>2</sub>       | 310                           | 331                 | 0.26                                | 42                                     | [10]         |
| NiCo-LDH                            | 290                           | 410                 | 3.5                                 | 113                                    | [11]         |
| Zn-Co-LDH-100                       | 330                           | 510                 | 0                                   | 83                                     | [12]         |

a) All these OER performances were tested in 0.1 M KOH solution.

“-” represents that the value can't be obtained from the literature.

### III. Supplementary references

- [1] M. Gong, Y. Li, H. Wang, Y. Liang, J. Z. Wu, J. Zhou, J. Wang, T. Regier, F. Wei, H. Dai, *J. Am. Chem. Soc.* 2013, **135**, 8452.
- [2] S. Chen, S.-Z. Qiao, *ACS Nano* 2013, **7**, 10190.
- [3] J. Wang, H. X. Zhong, Y. L. Qin, X. B. Zhang, *Angew. Chem. Int. Ed.* 2013, **52**, 5248.
- [4] X. Zhou, Z. Xia, Z. Zhang, Y. Ma, Y. Qu, *J. Mater. Chem. A* 2014, **2**, 11799.
- [5] Z. Lu, W. Xu, W. Zhu, Q. Yang, X. Lei, J. Liu, Y. Li, X. Sun, X. Duan, *Chem. Commun.* 2014, **50**, 6479.
- [6] D. Tang, J. Liu, X. Wu, R. Liu, X. Han, Y. Han, H. Huang, Y. Liu, Z. Kang, *ACS Appl. Mater. Interfaces* 2014, **6**, 7918.
- [7] Y. Zhao, S. Chen, B. Sun, D. Su, X. Huang, H. Liu, Y. Yan, K. Sun, G. Wang, *Sci. Rep.* 2015, **5**, 7629.
- [8] T. Y. Ma, S. Dai, M. Jaroniec, S. Z. Qiao, *J. Am. Chem. Soc.* 2014, **136**, 13925.
- [9] Z. Zhao, H. Wu, H. He, X. Xu, Y. Jin, *Adv. Funct. Mater.* 2014, **24**, 4698.
- [10] M. Gao, W. Sheng, Z. Zhuang, Q. Fang, S. Gu, J. Jiang, Y. Yan, *J. Am. Chem. Soc.* 2014, **136**, 7077.
- [11] J. Jiang, A. Zhang, L. Li, L. Ai, *J. Power Sources* 2015, **278**, 445.
- [12] Y. Li, L. Zhang, X. Xiang, D. Yan, F. Li, *J. Mater. Chem. A* 2014, **2**, 13250.
